# Supplementary material for: A bipyridyl thorium metallocene: synthesis, structure and reactivity
Source: Royal Society of Chemistry journal article supplement (doi:10.1039/c2dt00051b), 2012-01-01
Supplement: c2dt00051b.pdf [file c2dt00051b.pdf]

*Supplementary Information for*

## A bipyridyl thorium metallocene: synthesis, structure and reactivity

Wenshan Ren,<sup>a</sup> Haibin Song,<sup>b</sup> Guofu Zi,<sup>\*a</sup> and Marc D. Walter<sup>\*c</sup>

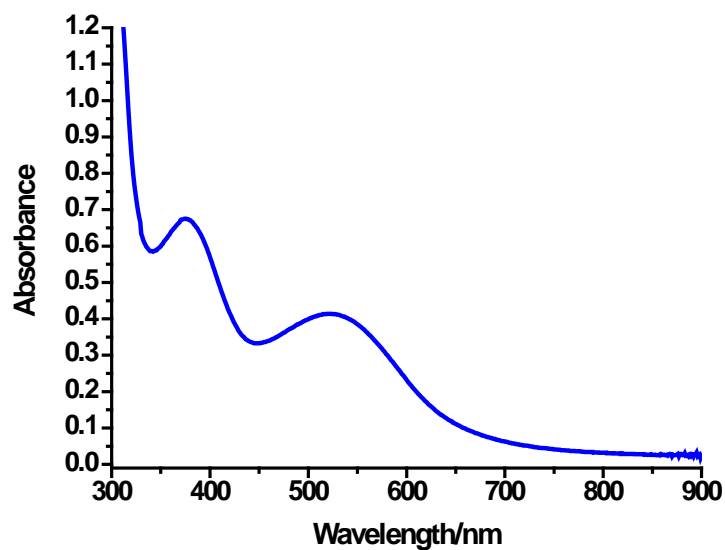

**Fig. S1.** UV-Vis spectrum of [η<sup>5</sup>-1,3-(Me<sub>3</sub>C)<sub>2</sub>C<sub>5</sub>H<sub>3</sub>]<sub>2</sub>Th(bipy) (**2**) (concentration is  $2.5 \times 10^{-4}$  M in toluene).  $\lambda_{\text{max}} = 375$  nm ( $\epsilon = 2.70 \times 10^3$  M<sup>-1</sup>cm<sup>-1</sup>), 522 nm ( $\epsilon = 1.66 \times 10^3$  M<sup>-1</sup>cm<sup>-1</sup>).

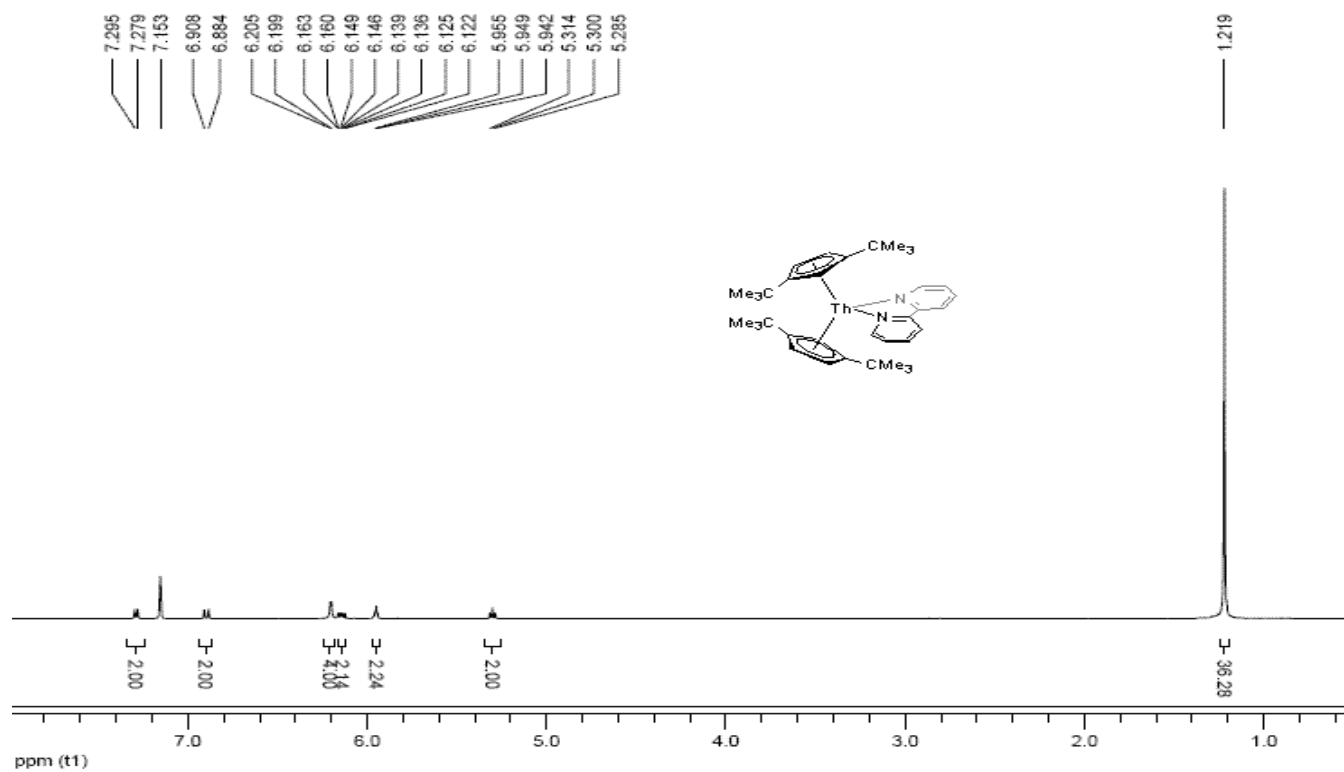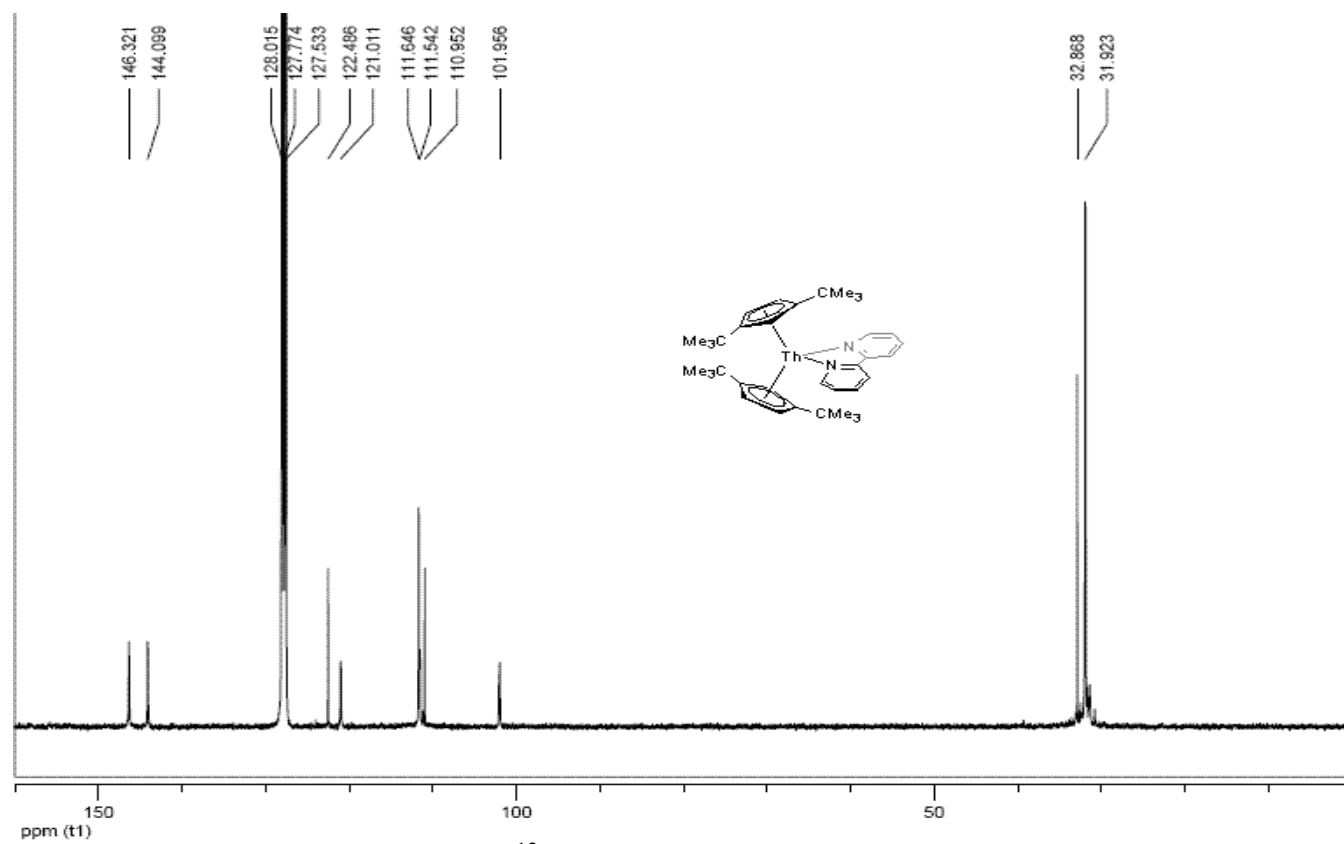

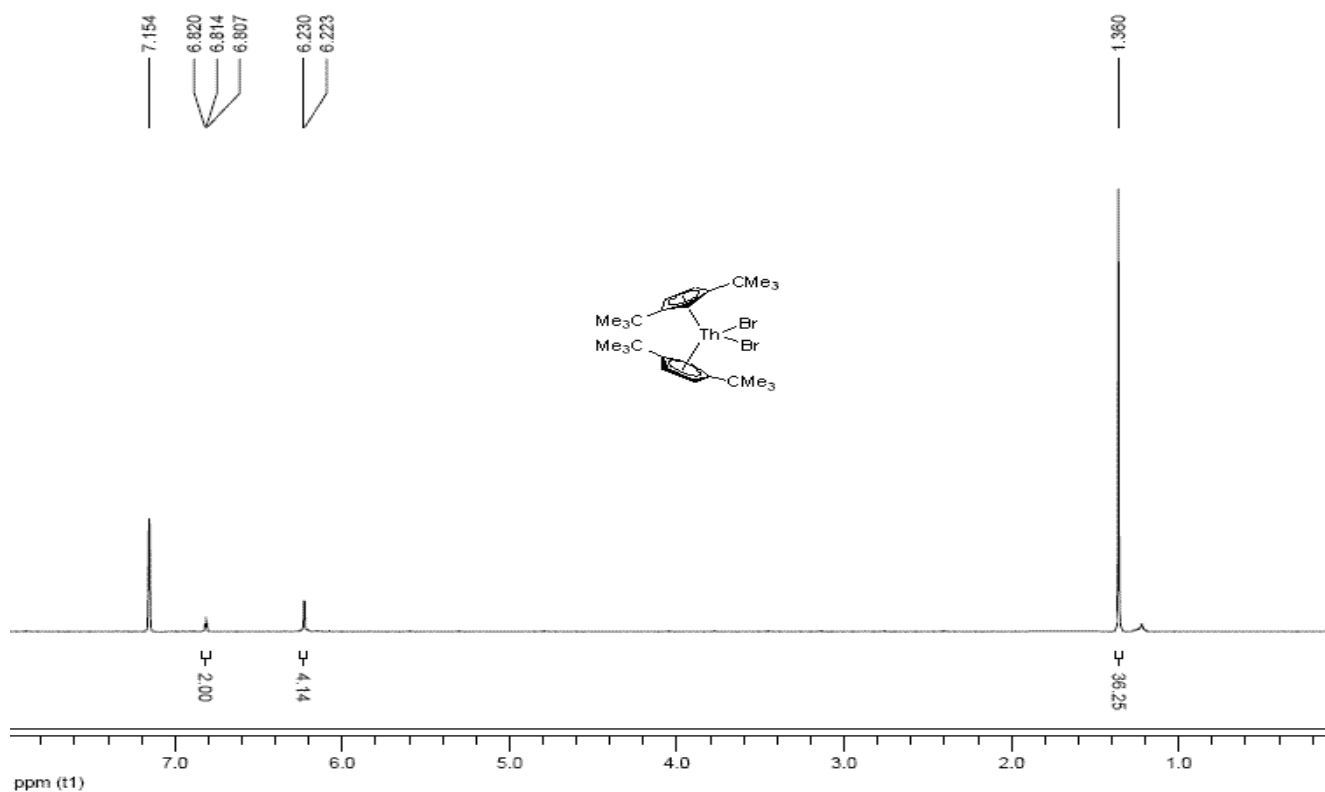

Figure S4. <sup>1</sup>H NMR spectrum of the complex 3.

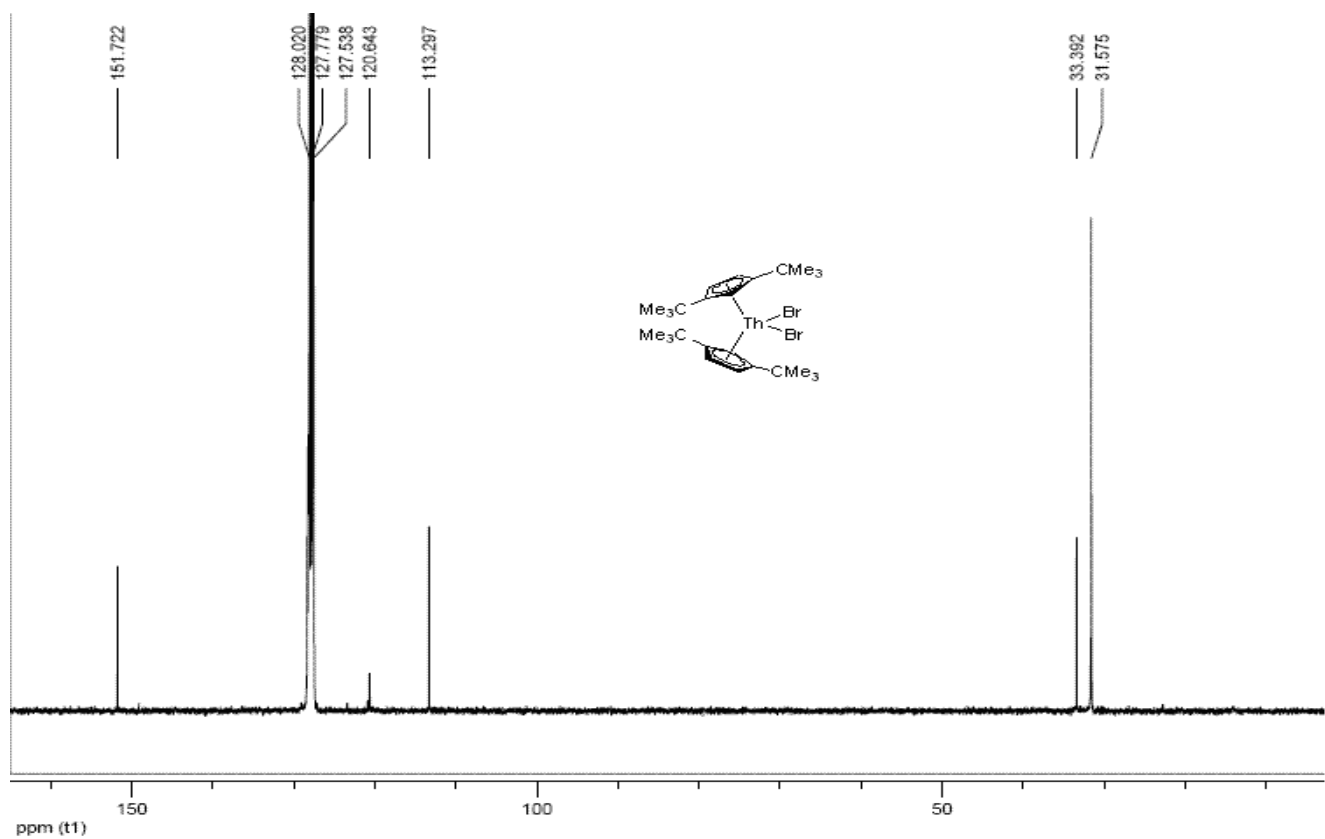

Figure S5. <sup>13</sup>C NMR spectrum of the complex 3.

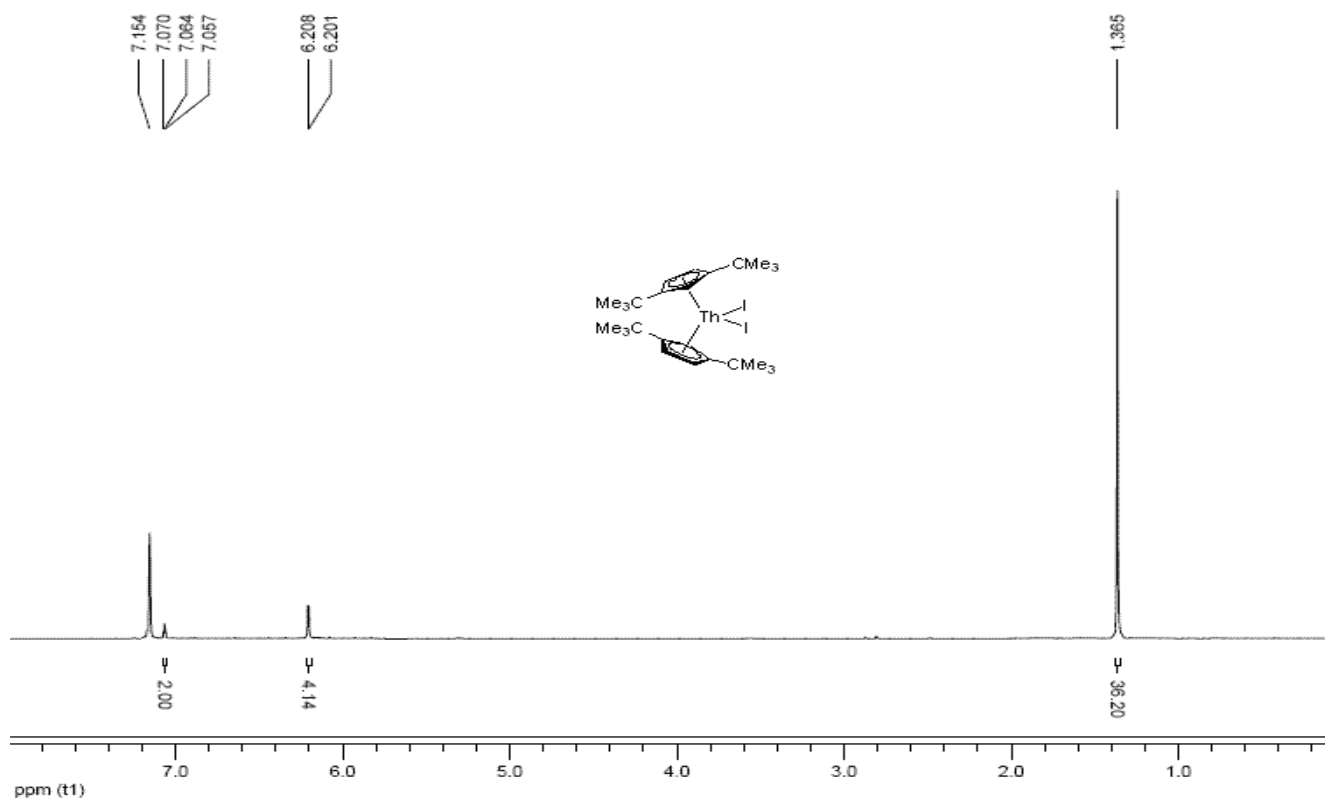

Figure S6. <sup>1</sup>H NMR spectrum of the complex 4.

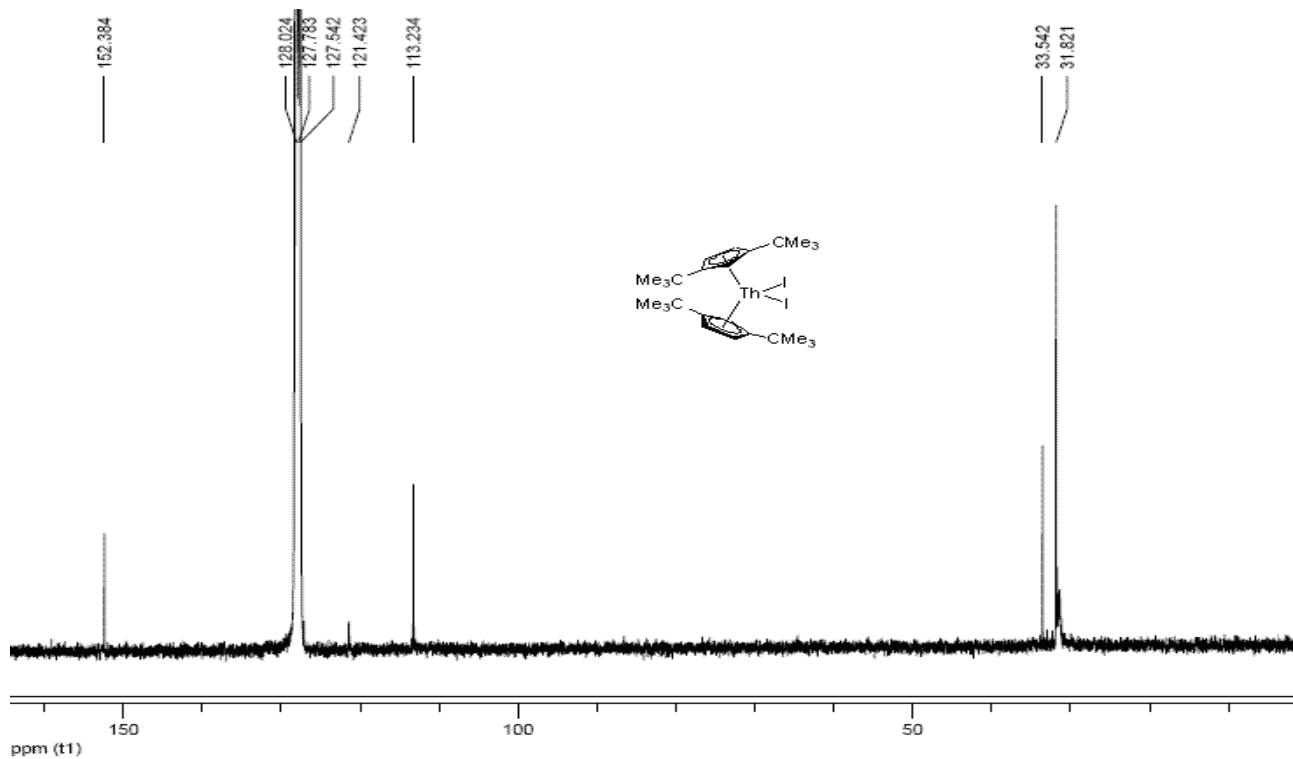

Figure S7. <sup>13</sup>C NMR spectrum of the complex 4.

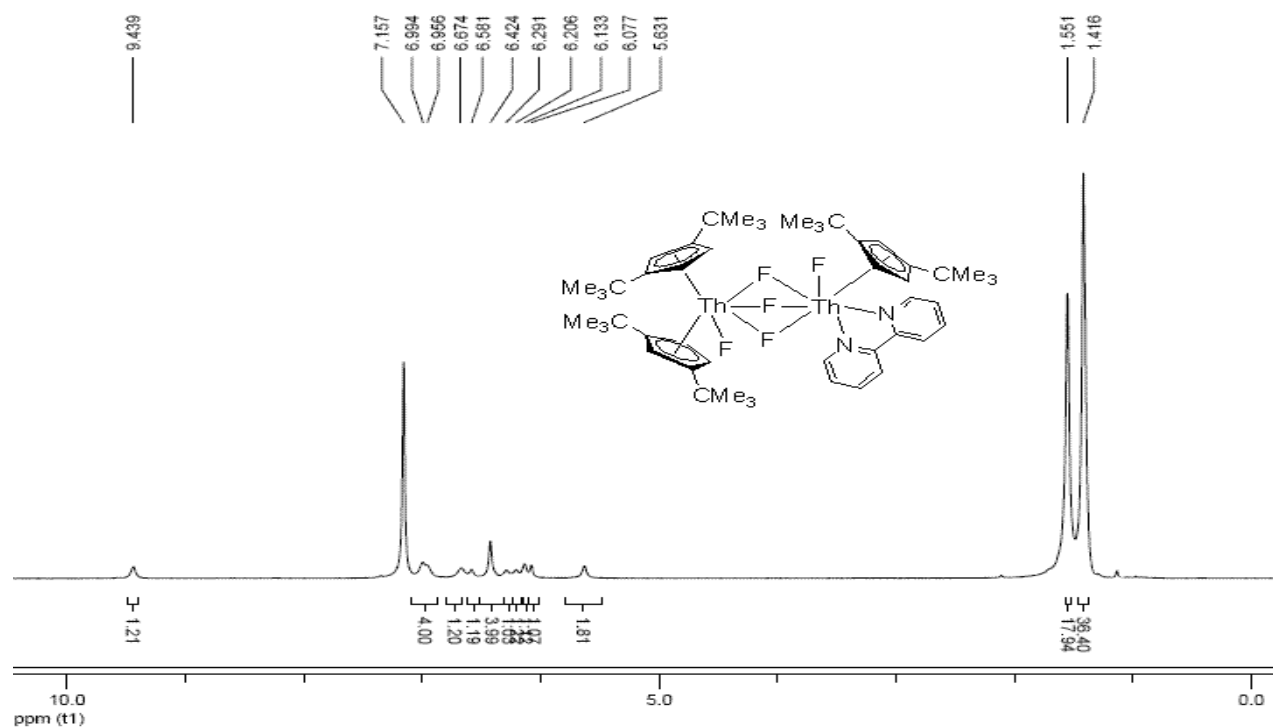

Figure S8. <sup>1</sup>H NMR spectrum of the complex 5.

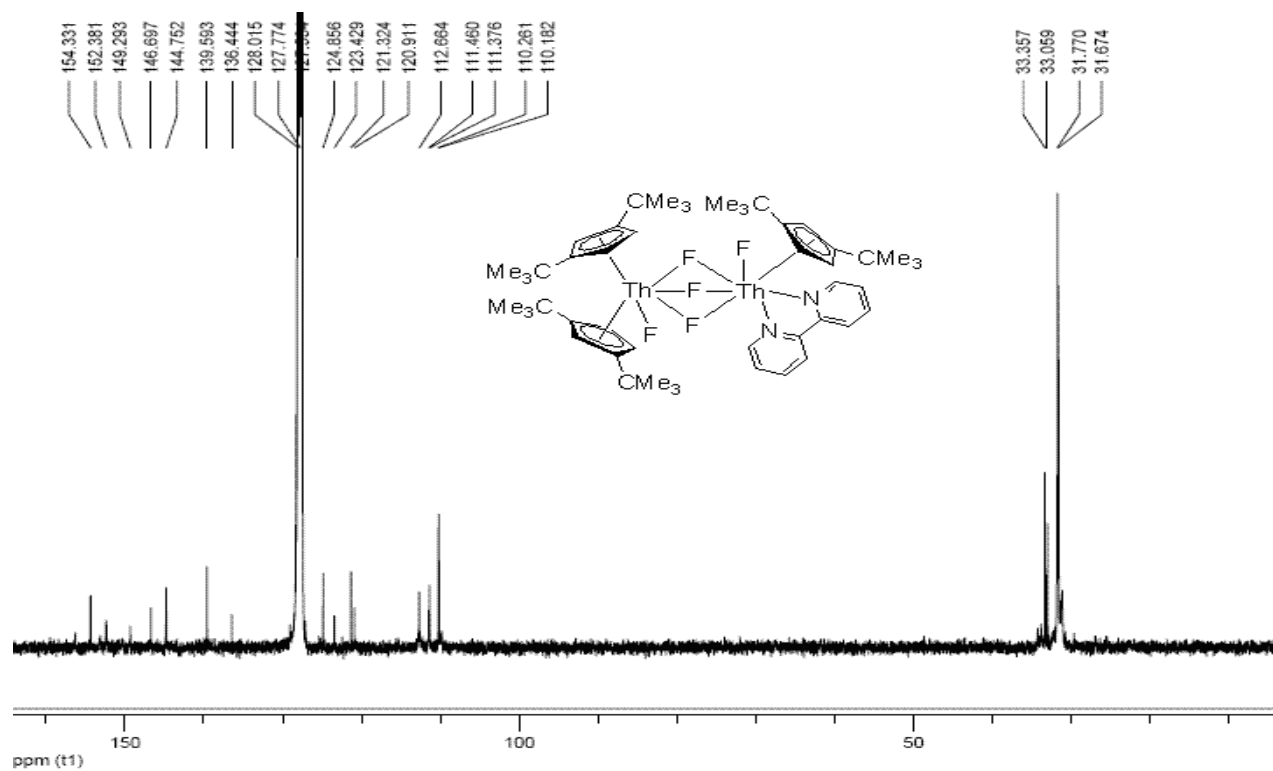

Figure S9. <sup>13</sup>C NMR spectrum of the complex 5.

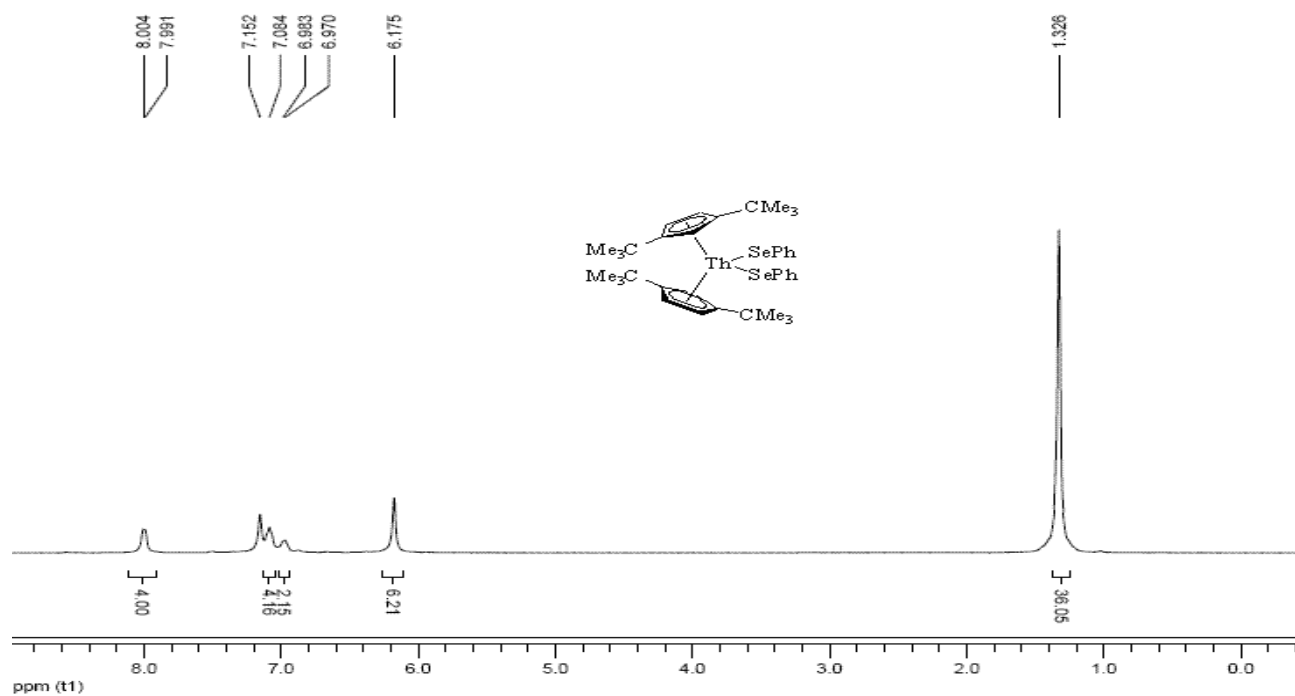

Figure S10.  $^1\text{H}$  NMR spectrum of the complex 6.

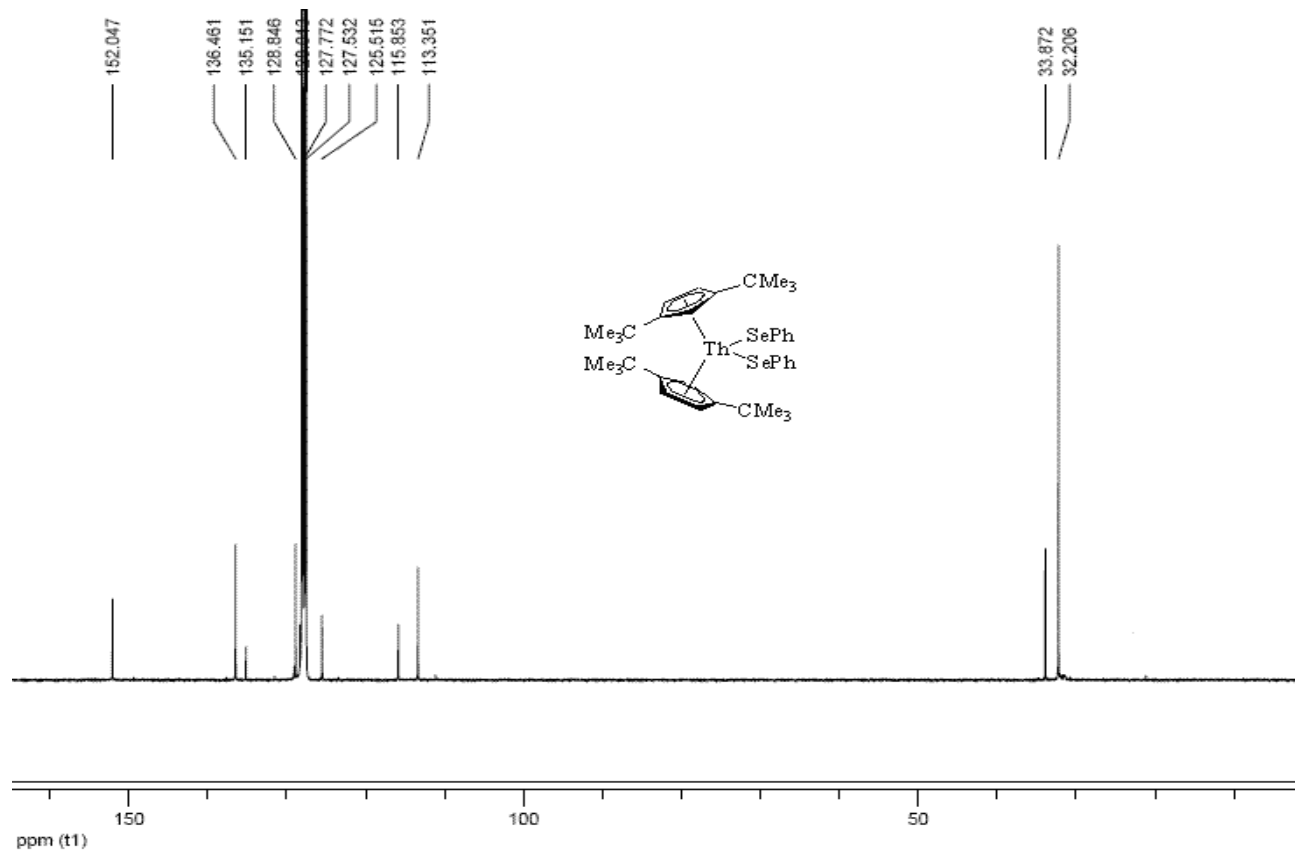

Figure S11.  $^{13}\text{C}$  NMR spectrum of the complex 6.

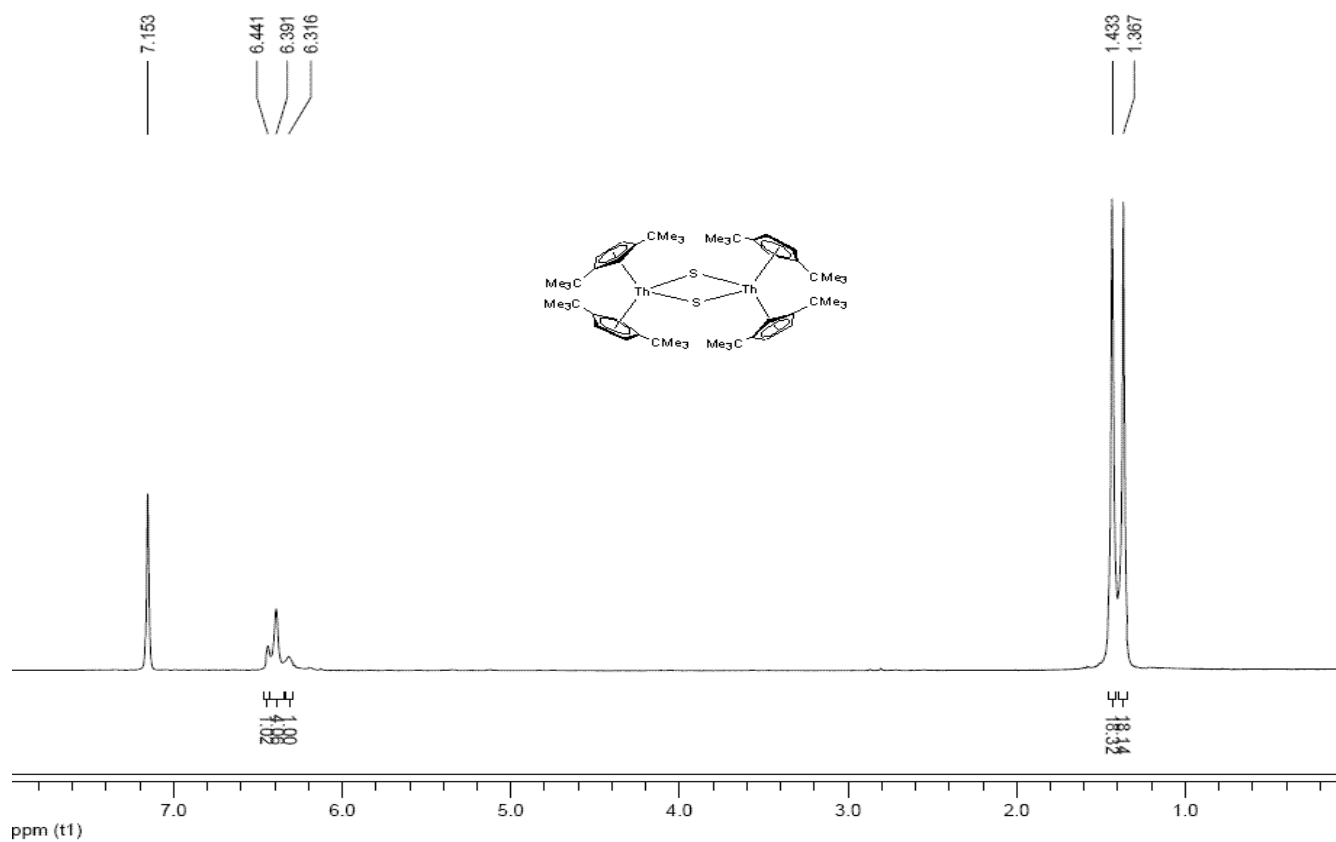

Figure S12. <sup>1</sup>H NMR spectrum of the complex **8**.

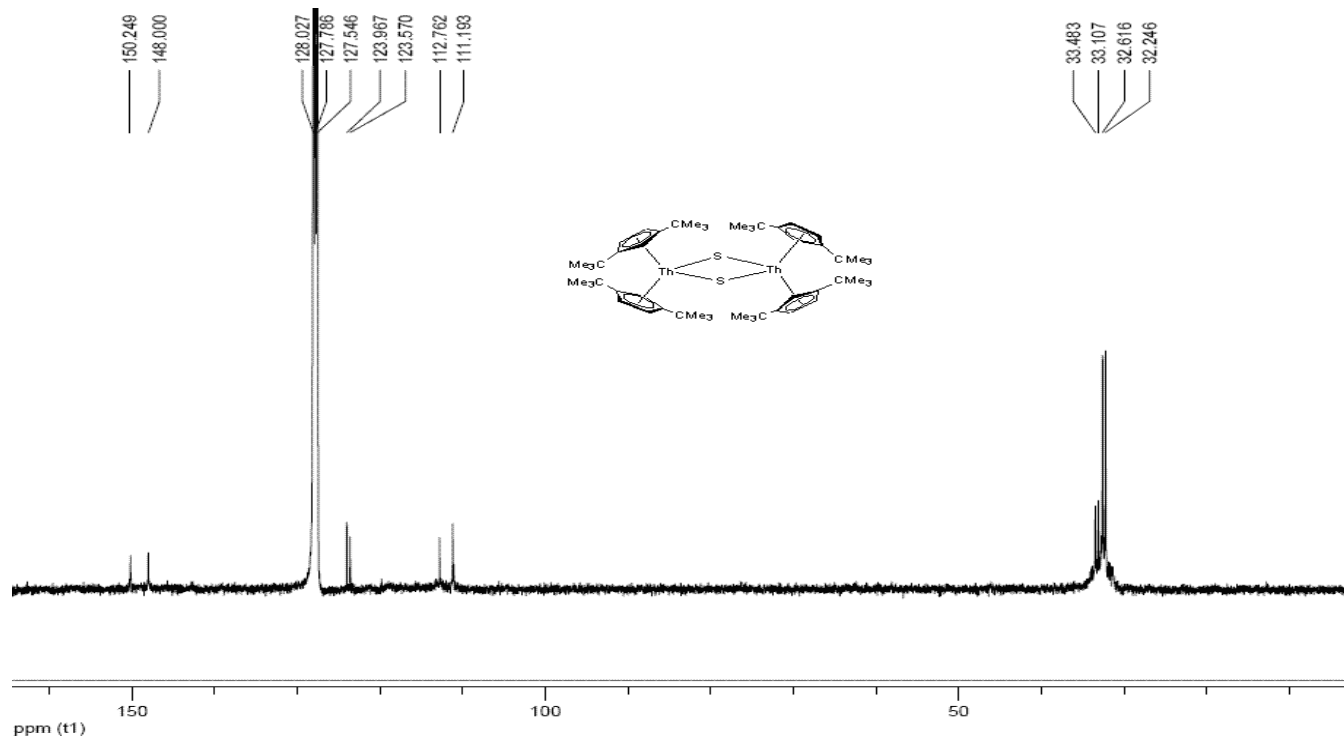

Figure S13. <sup>13</sup>C NMR spectrum of the complex **8**.

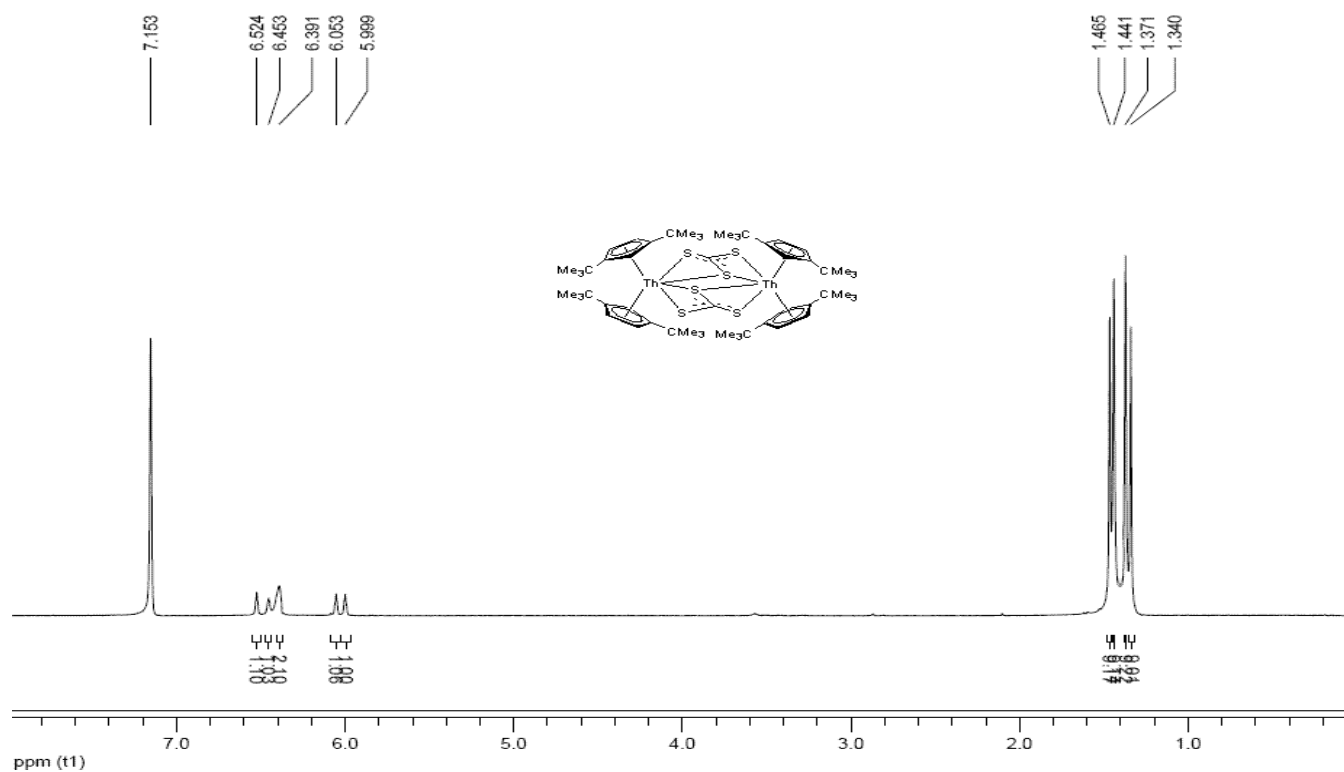

Figure S14.  $^1\text{H}$  NMR spectrum of the complex 10.

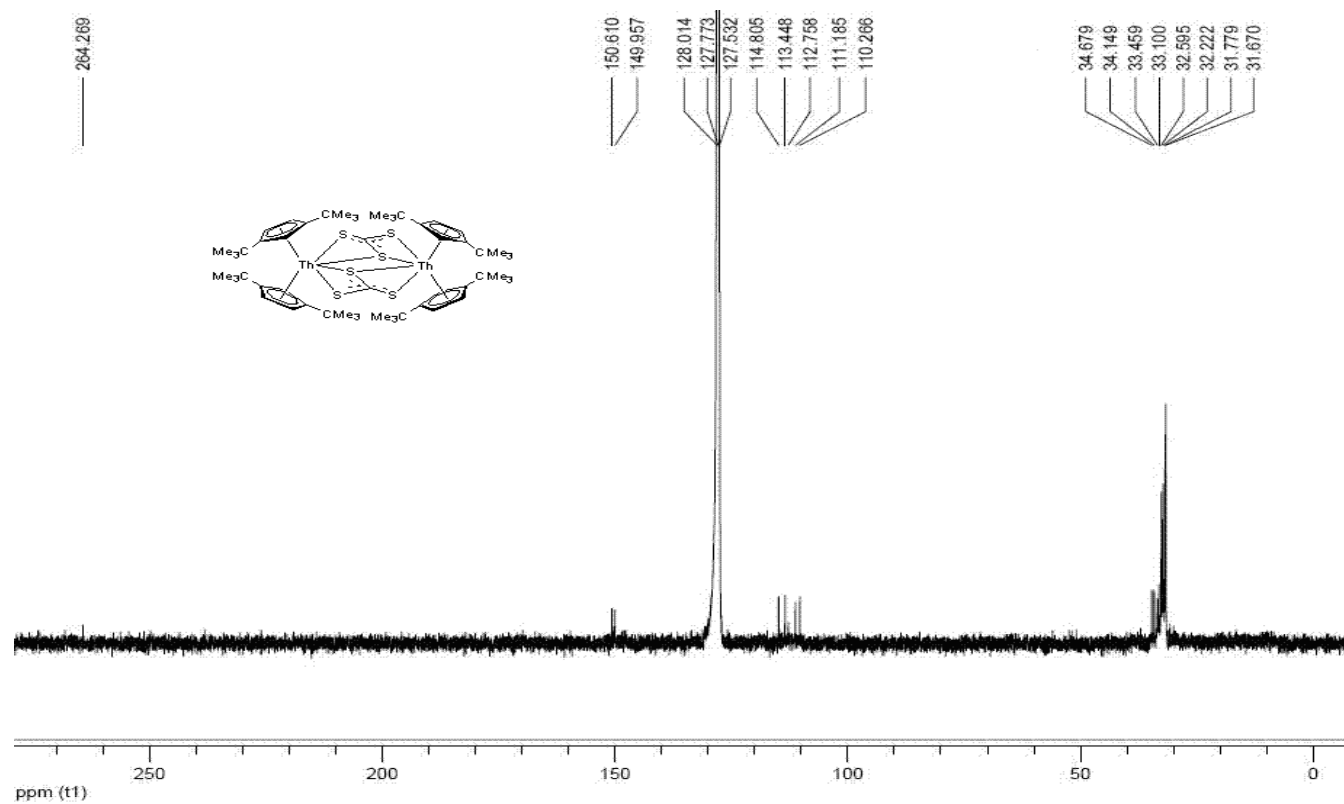

Figure S15.  $^{13}\text{C}$  NMR spectrum of the complex 10.
